# Supplementary material for: Development and psychometric evaluation of a health questionnaire on back care knowledge in daily life physical activities for adolescent students
Source: Springer Nature journal article supplement (doi:10.1007/s00586-016-4627-9), 2016-06-01
Supplement: MOESM1 [file 10240050]

## Appendix I

NOMBRE DE LA ESCUELA:..... CURSO:.....

Identificación:.....

(Escribe las dos primeras letras de tu nombre y apellidos. Por ejemplo: José Martínez López = JOMALO)

Edad:..... Peso: ..... Talla: .....

## CUESTIONARIO DE CONOCIMIENTO

Esta cuestionario busca conocer qué sabes sobre la salud en general y de forma más concreta sobre la salud de la espalda y la postura corporal .

Por favor, contesta marcando con una “x” la letra que corresponde a la respuesta correcta, sólo una respuesta por pregunta. Si tienes alguna duda responde la mejor de las opciones o pregunta al profesor.

1. La columna vertebral está en:

- El abdomen..... a
- El tronco..... b
- Las piernas..... c
- La cabeza..... d

2. ¿Cuántas curvas tiene la columna vertebral?

- Dos..... a
- Tres..... b
- Cuatro..... c
- Cinco ..... d

3. ¿Qué nombres reciben las diferentes partes de la columna vertebral?

- Alta, media y baja..... a
- Cuello, espalda, riñones y sacro..... b
- Cervical, dorsal, lumbar y sacra..... c
- Cabeza, espalda y cadera..... d

4. ¿Por qué tiene curvas la columna vertebral?

- Para ser más ancha de arriba y más estrecha de abajo..... a
- Para sujetar los brazos y las piernas..... b
- Para soportar mayor cantidad de peso..... c
- Para apoyarse mejor al sentarse..... d

5. ¿Qué función tiene la columna vertebral en el cuerpo?

- Enderezar la espalda y estirar los ligamentos para hacernos más altos... a
- Proteger la médula espinal, transmitir el peso a los miembros inferiores y dar movilidad a la espalda..... b
- Soportar las vísceras y ayudarnos a respirar..... c
- Hacer plana la espalda..... d

6. ¿Cuál de estos músculos es un músculo del tronco?

- Cuádriceps..... a
- Bíceps braquial..... b
- Esternocleidomastoideo..... c
- Recto del abdomen..... d

7. La musculatura del tronco está para:

- Dar estabilidad a la espalda y sujetar las vísceras..... a
- Sujetar la grasa del abdomen y la cintura..... b
- Adornar el cuerpo..... c
- Conseguir un abdomen plano..... d

8. La posición más estresante para tu espalda es:

- Tumbado de lado..... a
- Sentado..... b
- De pie..... c
- Tumbado boca arriba..... d

9. Cuál de estas posturas es la más correcta.

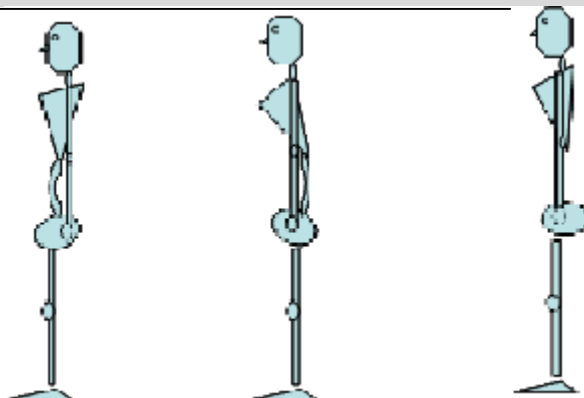

Ninguna

a

b

c

d

10. Cuando estoy de pie sin desplazarme durante un tiempo prolongado debo:

- Alternar el peso del cuerpo de una pierna a otra procurando no flexionar ni girar el tronco durante mucho tiempo. .... a
- Mantener los pies juntos y girar cuello y tronco para atender a las conversaciones.... b
- Procurar llevar un calzado con tacones para relajar el tronco..... c
- Permanecer lo más quieto posible..... d

11. Cuando estoy sentado durante un tiempo prolongado (viendo la televisión, estudiando, trabajando, etc.) debo:

- Apoyar la zona más alta (dorsal) de la espalda en el respaldo de la silla y el culo en el borde del asiento..... a
- Apoyar la zona baja (lumbar) de la espalda en el respaldo manteniendo el tronco recto y los pies apoyados evitando la presión de los muslos sobre el asiento. .... b
- Girar la columna para hablar con alguien o coger algo que esté en un lado o detrás. .... c
- Juntar las piernas y sentarme con decoro..... d

12. Cuando estoy sentado frente a una mesa de estudio o trabajo.

- Para levantarme de la silla debo salir por un lado de ésta, girando y flexionando el tronco hacia ese lado. .... a
- La altura de la mesa de estudio debe llegar casi a la altura del pecho y no debo apoyar los antebrazos y/o codos en ella. .... b
- Cuando leo debo utilizar un atril para apoyar e inclinar los libros y apuntes es perjudicial para mi nuca. .... c
- Debo apoyar siempre los codos en la mesa. .... d

13. Cuando estoy sentado frente a una mesa de estudio o trabajo con un ordenador.

- La pantalla debe estar a un lado para mirar con la cabeza girada..... a
- La altura a la que debo situar el teclado y el ratón del ordenador debe ser la de los codos..... b
- La pantalla debo tenerla cerca para ver mejor..... c
- Debo apoyar las muñecas para escribir en el teclado..... d

14. Cuando debo transportar libros u otros objetos largas distancias lo mejor es utilizar:

- Bolsas de mano. .... a
- Mochila. .... b
- Bolsa en bandolera..... c
- Una bolsa o mochila con ruedas (carro). .... d

15. Cuando llevo mochila con libros el peso que debo llevar es:

- El menor peso posible y nunca más de la 10ª parte del peso de mi cuerpo.... a
- Todo el que pueda resistir sin que provoque dolor de espalda y nunca más de la mitad de mi peso corporal. .... b
- No es importante cuánto peso llevo..... c
- No debo llevar más de una cuarta parte del peso de mi cuerpo..... d

|    |                                                                                                                                             |   |
|----|---------------------------------------------------------------------------------------------------------------------------------------------|---|
| 16 | Cuando transporto peso en mi mochila debo llevarla en la espalda: (v 1)                                                                     |   |
|    | -Con un asa, colgada de un solo hombro.....                                                                                                 | a |
|    | -Con dos asas, cada una colgada de un hombro.....                                                                                           | b |
|    | -Con un asa sobre un hombro cruzada por delante.....                                                                                        | c |
|    | -Con dos asas, cada una colgada de un hombro y sujeta a la espalda por la cintura.....                                                      | d |
| 17 | Cuando transporto peso en mi mochila:                                                                                                       |   |
|    | -No es importante distribuir bien el peso en el interior de la mochila.....                                                                 | a |
|    | -Debo colocar los objetos más pesados en la zona de la mochila que está cercana a mi cuerpo y los menos pesados en la zona más alejada..... | b |
|    | -Debo colocar los objetos menos pesados en la zona de la mochila que está cercana a mi cuerpo y los más pesados en la zona más alejada..... | c |
|    | -Debo colocar los objetos más pesados en el centro.....                                                                                     | d |
| 18 | Cuando transporto peso en bolsas debo:                                                                                                      |   |
|    | - Repartir el peso de forma igual entre los dos brazos.....                                                                                 | a |
|    | - Llevar lo más pesado en mi brazo hábil y lo menos pesado en mi brazo menos hábil. ....                                                    | b |
|    | - Llevar el peso en una bolsa sobre el brazo más fuerte.....                                                                                | c |
|    | - Sujetar el peso con mis dos brazos a la vez.....                                                                                          | d |
| 19 | Cuando debemos transportar grandes pesos es mejor: (v 2)                                                                                    |   |
|    | -Llevar una bolsa o mochila con carrito para tirar de ella.....                                                                             | a |
|    | -Llevar una bolsa o mochila con carrito para empujar de ella.....                                                                           | b |
|    | -Cargarlo con los brazos.....                                                                                                               | c |
|    | -Repartirlo en dos bolsas para llevar cada una con una mano.....                                                                            | d |
| 20 | Cuando debo sujetar objetos pesados con los brazos es mejor:                                                                                |   |
|    | -Estirar los brazos y mantener el objeto lo más alejado posible del cuerpo.....                                                             | a |
|    | -Estirar los brazos y mantener el objeto ligeramente alejado del cuerpo.....                                                                | b |
|    | -Llevarlo con un solo brazo apoyado en un costado.....                                                                                      | c |
|    | -Sujetarlo con ambos brazos tratando que esté lo más cerca posible del cuerpo..                                                             | d |

|    |                                                                                                      |   |
|----|------------------------------------------------------------------------------------------------------|---|
| 21 | Cuando tengo que levantar objetos pesados del suelo debo:                                            |   |
|    | - Mantener los pies lo más alejados del objeto y levantarlo.....                                     | a |
|    | - Mantener la espalda recta y realizar la fuerza con las piernas.....                                | b |
|    | -Mantener las piernas estiradas y realizar la fuerza con el tronco.....                              | c |
|    | -Mantener el objeto al lado de mi cuerpo y girar y flexionar el tronco para realizar la fuerza. .... | d |
| 22 | Cuando tengo que alcanzar objetos que se encuentran por encima de mi cabeza debo:                    |   |
|    | - Estirar los brazos y el tronco hasta alcanzarlo. ....                                              | a |
|    | - Coger una escalera y subir hasta tener el objeto enfrente.....                                     | b |
|    | - Saltar hasta alcanzarlo.....                                                                       | c |
|    | - Ponerme de puntillas y estirarme todo lo que pueda hasta alcanzarlo..                              | d |
| 23 | Cuando duermo la mejor posición es:                                                                  |   |
|    | - Boca abajo.....                                                                                    | a |
|    | -Boca arriba.....                                                                                    | b |
|    | -De lado.....                                                                                        | c |
|    | -Todas son buenas.....                                                                               | d |
| 24 | La superficie sobre la que duermo debe ser:                                                          |   |
|    | - Dura.....                                                                                          | a |
|    | - Blanda.....                                                                                        | b |
|    | -Firme pero cómoda.....                                                                              | c |
|    | -Ni blanda ni dura. ....                                                                             | d |
