# Supplementary material for: Development and psychometric evaluation of a health questionnaire on back care knowledge in daily life physical activities for adolescent students
Source: Springer Nature journal article supplement (doi:10.1007/s00586-016-4627-9), 2016-06-01
Supplement: MOESM2 [file 10240050]

**TRANSLATED VERSION**

School name:..... School year:.....

Identification:.....

(Write the first two letters of your name and surnames. For example: José Martínez López = JOMALO)

Age:..... Weight: ..... Size: .....

**QUESTIONNAIRE OF KNOWLEDGE**

This questionnaire is aimed at evaluating your knowledge on back health and posture. Please, mark an 'X' on the correct answer (a, b, c or d). Only one answer is correct. If you are not sure, choose the one you think is better or ask your teacher.

|    |                                                  |   |
|----|--------------------------------------------------|---|
| v1 | The spine is located in...:                      |   |
|    | - The abdomen.....                               | a |
|    | - The trunk.....                                 | b |
|    | - The legs.....                                  | c |
|    | - The head.....                                  | d |
| v2 | How many curves does the spine have?             |   |
|    | -Two.....                                        | a |
|    | -Three.....                                      | b |
|    | - Four.....                                      | c |
|    | - Five.....                                      | d |
| v3 | How are the different parts of the spine called? |   |
|    | - High, middle and low.....                      | a |
|    | - Neck, back, kidneys and sacrum.....            | b |
|    | - Cervical, thoracic, lumbar and sacrum.....     | c |
|    | - Head, back and hip.....                        | d |

|    |                                                                                                        |   |
|----|--------------------------------------------------------------------------------------------------------|---|
| v4 | The spine has got curves in order to...                                                                |   |
|    | - be wider in its upper side and narrower in its lower side.....                                       | a |
|    | - support the arms and the legs.....                                                                   | b |
|    | - bear a larger amount of weight.....                                                                  | c |
|    | - provide a better support when sitting on a chair.....                                                | d |
| v5 | What is the function of the spine in the body?                                                         |   |
|    | - To straighten your back and stretch your ligaments to become taller..                                | a |
|    | - To protect the spinal cord, transmit the weight to the lower limbs and provide back flexibility..... | b |
|    | - To support the viscera and help us breathe.....                                                      | c |
|    | - To flatten the back.....                                                                             | d |
| v6 | Which of the following muscles is a trunk muscle?                                                      |   |
|    | - The quadriceps.....                                                                                  | a |
|    | - The biceps brachii.....                                                                              | b |
|    | - The sternocleidomastoid.....                                                                         | c |
|    | - The rectus abdominis.....                                                                            | d |
| v7 | The function of the trunk musculature is:                                                              |   |
|    | - To control back stability and support the viscera.....                                               | a |
|    | - To support fat from the abdomen and the waist.....                                                   | b |
|    | - To embellish the body.....                                                                           | c |
|    | - To get a flatter abdomen.....                                                                        | d |
| v8 | The most stressful posture for your back is:                                                           |   |
|    | - Lying on one side.....                                                                               | a |
|    | - Sitting.....                                                                                         | b |
|    | - Standing.....                                                                                        | c |
|    | - Lying face up.....                                                                                   | d |

v9 Which of the following postures is the most adequate?

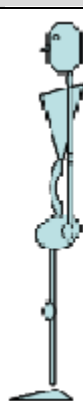

a

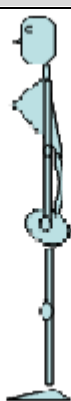

b

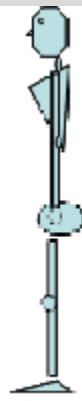

c

None

d

v10 When standing for a while without moving, I should:

- Shift the weight from one leg to the other, trying not to bend or twist the trunk for a long time ..... a
- Keep my feet still and twist my neck and trunk to hold conversations.... b
- Wear high-heeled shoes to relax the trunk muscles..... c
- Remain as steady as possible..... d

v11 When sitting during a long time (watching TV, studying, working, etc.), I should:

- put my upper back on the chair backrest and sit on the seat edge..... a
- put my lower back on the chair backrest, keeping the trunk in an up-right position and both feet flat on the floor, avoiding thighs pressure. .... b
- turn the spine to talk to someone or fetch something which is on one side or behind me. .... c
- keep my legs close together and sit with decorum..... d

v12 When sitting by a desk...

- I have to twist and bend my trunk to stand up from the chair..... a
- The desk height should be just below my chest height and I should not rest my forearms and/or elbows on it. .... b
- The bookstand to hold my books and notes when reading is harmful to my neck.... c
- I should always rest my elbows on the desk..... d

|     |                                                                                                         |   |
|-----|---------------------------------------------------------------------------------------------------------|---|
| v13 | When sitting by a desk with a computer                                                                  |   |
|     | - The screen should be on one side and I have to twist my head to look at it.                           | a |
|     | - The computer keyboard and the mouse should be at my elbows height.....                                | b |
|     | - I should sit near the screen to see it better.....                                                    | c |
|     | - I should rest my wrists on it to type on the keyboard.....                                            | d |
| v14 | When carrying books or objects some distance away, the best option is to use:                           |   |
|     | -A handbag .....                                                                                        | a |
|     | -A backpack .....                                                                                       | b |
|     | -A shoulder bag .....                                                                                   | c |
|     | -A rolling backpack .....                                                                               | d |
| v15 | When carrying a schoolbag with books, the weight should be:                                             |   |
|     | -The least amount of weight possible and never more than 10% of my bodyweight....                       | a |
|     | -As much as I can support without suffering backache and never more than one half of my bodyweight..... | b |
|     | -It is not important the weight I carry.....                                                            | c |
|     | -I should not support more than a quarter of my bodyweight.....                                         | d |
| v16 | When carrying weight in my schoolbag, I should wear it on my back:                                      |   |
|     | - with one strap, worn over one shoulder.....                                                           | a |
|     | - with two straps, worn over one shoulder.....                                                          | b |
|     | - with one strap worn over one shoulder and wound around the chest.....                                 | c |
|     | - with two straps, each one worn over one shoulder and tightened at the back by a waist strap.....      | d |
| v17 | When carrying weight in my schoolbag:                                                                   |   |
|     | - It is not important to distribute weight inside the bag properly.....                                 | a |
|     | - I should pack the heaviest items in the bag close to my body and the lightest ones away from it.      | b |
|     | - I should pack the lightest items in the bag close to my body and the heaviest ones away from it.....  | c |
|     | - I should put the heaviest items in the middle of the bag.....                                         | d |

|     |                                                                                                     |   |
|-----|-----------------------------------------------------------------------------------------------------|---|
| v18 | When carrying weight in bags, I should:                                                             |   |
|     | - distribute the weight evenly between the two arms.....                                            | a |
|     | - use my dominant arm for the heaviest weight and my non-dominant arm for the lightest weight ..... | b |
|     | - only use my dominant arm.....                                                                     | c |
|     | - simultaneously use my two arms to hold the weight.....                                            | d |
| v19 | When carrying a heavy load, it is better to: (v 1)                                                  |   |
|     | -pull a rolling bag.....                                                                            | a |
|     | -push a rolling bag.....                                                                            | b |
|     | -carry it on your arms.....                                                                         | c |
|     | -distribute them in both hands using two bags.....                                                  | d |
| v20 | When holding heavy loads in your arms, it is better to:                                             |   |
|     | -stretch your arms and keep the object as far as possible from your body.....                       | a |
|     | -stretch your arms and keep the object slightly far from your body.....                             | b |
|     | -carry the object on your side using only one arm.....                                              | c |
|     | -hold the object with both arms to keep it as close as possible to your body....                    | d |
| v21 | When lifting heavy objects off of the floor, I should:                                              |   |
|     | - keep my feet as far as possible from the object.....                                              | a |
|     | - keep my back straight and apply force with my legs.....                                           | b |
|     | -keep my legs stretched and apply force with my trunk.....                                          | c |
|     | -put the object beside my body and lift it twisting and bending my trunk to apply force .....       | d |
| v22 | When reaching for an object which is over my head, it is better to:                                 |   |
|     | - stretch the arms and the trunk as much as necessary .....                                         | a |
|     | - climb a ladder to face the object.....                                                            | b |
|     | - jump to fetch it.....                                                                             | c |
|     | - stand on tiptoes and stretch my body..                                                            | d |

---

v23 When sleeping, the best posture is:

- Face-down..... a
  - Face-up..... b
  - On one side..... c
  - Any one..... d
- 

v24 The surface where I sleep on should be:

- Firm..... a
  - Soft..... b
  - Firm but comfortable..... c
  - Neither firm nor soft. .... d
-
